# Supplementary material for: Medication Errors in Intensive Care Units: An Umbrella Review of Control Measures
Source: MDPI journal article supplement (doi:10.3390/healthcare10071221), 2022-06-29
Supplement: s1 [file s1]

## Supplementary File S2 Search strategy

| No. | Query EMBASE                                                                              | Results |
|-----|-------------------------------------------------------------------------------------------|---------|
| #22 | #20 AND #21                                                                               | 332     |
| #21 | #13 AND #17                                                                               | 7796    |
| #20 | #18 OR #19                                                                                | 334603  |
| #19 | 'systematic review':ti,ab,kw                                                              | 211019  |
| #18 | 'metaanalysis':ti,ab,kw OR 'meta analysis':ti,ab,kw OR 'meta-analysis':ti,ab,kw           | 213139  |
| #17 | #14 OR #15 OR #16                                                                         | 5230154 |
| #16 | 'system':ti,ab,kw                                                                         | 2905199 |
| #15 | 'strategy':ti,ab,kw OR 'strategies':ti,ab,kw                                              | 1413137 |
| #14 | 'intervention':ti,ab,kw OR 'interventions':ti,ab,kw                                       | 1358938 |
| #13 | #3 OR #5 OR #6 OR #7 OR #8 OR #9 OR #10 OR #11 OR #12                                     | 17020   |
| #12 | 'near miss':ti,ab,kw OR 'medication safety':ti,ab,kw                                      | 6374    |
| #11 | 'discharged summaries error':ti,ab,kw OR 'discharged summaries errors':ti,ab,kw           | 1       |
| #10 | 'medication administration error':ti,ab,kw OR 'medication administration errors':ti,ab,kw | 443     |
| #9  | 'dispensing error':ti,ab,kw OR 'dispensing errors':ti,ab,kw                               | 545     |
| #8  | 'transcribing error':ti,ab,kw OR 'transcribing errors':ti,ab,kw                           | 38      |
| #7  | 'prescribing errors':ti,ab,kw OR 'prescribing error':ti,ab,kw                             | 1445    |
| #6  | 'preventable adverse drug event':ti,ab,kw OR 'preventable adverse drug events':ti,ab,kw   | 269     |
| #5  | 'medication incident':ti,ab,kw OR 'medication incidents':ti,ab,kw                         | 281     |
| #4  | 'medication incident'                                                                     | 113     |
| #3  | #1 OR #2                                                                                  | 10095   |
| #2  | 'medication errors':ti,ab,kw                                                              | 8716    |
| #1  | 'medication error':ti,ab,kw                                                               | 3122    |
